# Supplementary material for: A bacterial pigment provides cross-species protection from H2O2- and neutrophil-mediated killing
Source: Proc Natl Acad Sci U S A. 2024 Jan 3;121(2):e2312334121. doi: 10.1073/pnas.2312334121 (PMC10786307; doi:10.1073/pnas.2312334121)
Supplement: Supplementary file 1 — Appendix 01 (PDF) [file pnas.2312334121.sapp.pdf]

**Supporting Information for**

**A BACTERIAL PIGMENT PROVIDES CROSS-SPECIES PROTECTION FROM H<sub>2</sub>O<sub>2</sub>-  
AND NEUTROPHIL-MEDIATED KILLING**

**Yiwei Liu<sup>1,2</sup>**, Eleanor A. McQuillen<sup>3</sup>, Pranav S. J. B. Rana<sup>1,2</sup>, Erin. S. Gloag<sup>4</sup>, Matthew R. Parsek<sup>5</sup>  
, and Daniel J. Wozniak<sup>1,2</sup> \*

<sup>1</sup> Department of Microbiology, Ohio State University, Columbus, OH 43210

<sup>2</sup> Department of Microbial Infection and Immunity, Ohio State University College of Medicine,  
Columbus, OH 43210

<sup>3</sup> Department of Health and Rehabilitation Sciences, Ohio State University College of Medicine,  
Columbus, OH 43210

<sup>4</sup> Department of Biomedical Sciences and Pathobiology, Virginia Maryland College of Veterinary  
Medicine, Virginia Tech, Blacksburg, VA 24060

<sup>5</sup> Department of Microbiology, University of Washington School of Medicine, Seattle, WA 98195

\* Corresponding author: Daniel J. Wozniak

Email: [Daniel.Wozniak@osumc.edu](mailto:Daniel.Wozniak@osumc.edu)

This PDF file includes:

Supplementary text

Figures S1 to S13

Tables S1 to S3

SI References

## **Supplementary materials and methods:**

### **HQNO quantification**

HQNO production in the representative *P. aeruginosa* clinical isolates was performed as previously described (1). Briefly, bacterial overnight cultures grown in LB were centrifuged to obtain cell-free spent media. Each sample was diluted with an equivalent volume of methanol containing the internal standard (20 mg/L of d7-quinoline). The solution was then centrifuged at 13,000g for 15 min to obtain supernatant. HQNO concentration was then measured by Liquid Chromatograph Mass Spectrometer.

### **Neutrophil isolation**

Informed written consent was obtained from all 4 healthy donors before the collection of peripheral blood for isolating primary human neutrophils. All procedures were approved by the Ohio State University Institutional Review Board (IRB-2009H0314). Neutrophils were isolated as previously described(2). Briefly, heparinized blood from healthy human donors was collected in saline. Ficoll-Paque® PLUS (GR Healthcare) was layered on top of the blood and then centrifuged at  $404 \times g$  for 40min at 23°C. The pellet was then resuspended in an equal volume of 3% cold Dextran in 0.9% NaCl and allowed for sediment for 20min on ice. The upper layer was centrifuged at  $665 \times g$  for 10min at 4°C. The resulting pellet was resuspended in cold endotoxin-free H<sub>2</sub>O for 30s to lyse red blood cells before 1.8% NaCl solution was immediately added to restore isotonicity. The sample was centrifuged at  $131 \times g$  for 3min at 4°C, and the pellet containing neutrophils was resuspended in HBSS (without calcium, magnesium, or phenol red; Corning) and counted in a hemocytometer chamber(3).

### **Neutrophil killing assay**

This assay was carried out as previously described with modifications (4). *P. aeruginosa* and *S. aureus* overnight cultures were normalized to an OD<sub>600</sub> of 0.5, washed with HBSS, and opsonized

with 20% human serum (CompTech) for 30min at 37°C. The two bacteria were then either mixed at a 1 : 1 ratio or separately incubated with neutrophils statically for 1h at 37°C (MOI = 10 for each bacterial species). The samples were centrifuged at 18000 x g for 10min to lyse the neutrophils and release internalized bacteria. The pellets were resuspended in HBSS, serially diluted, and plated on PIA and MSA to enumerate CFUs. Bacterial survival was normalized to the CFUs at 0h. For microscopy analysis, neutrophils (2 x 10<sup>6</sup> cells per well) were seeded on poly-L-lysine coated coverslips in HBSS supplemented with 100 µM CellTracker™ Blue (Invitrogen) for 30min at 37°C, 5% CO<sub>2</sub>. Fluorescently tagged *P. aeruginosa* (PAO1-TdTomato)(5) was grown overnight in LB supplemented with 300ug/mL of carbapenem. Fluorescently tagged *S. aureus* (USA300-GFP)(6) was grown overnight in LB supplemented with or without 50µg/mL flavone. Attached neutrophils were infected with PAO1-TdTomato, USA300-GFP, or both species for 1h at 37°C, 5% CO<sub>2</sub> (MOI = 10 for each bacterial species). Unattached cells were washed away with HBSS. Coverslips were fixed in 4% paraformaldehyde for 30min at room temperature, mounted to slides using Prolong™ Gold antifade reagent (Invitrogen), and visualized using a Nikon Ti2 wide field microscope fitted with a 60x oil objective. 6 images with Z-stacks of 0.3µm step size were taken for each sample for each replicate. Using the NIS-elements AR software, images were clarified, deconvoluted, and thresholded to quantify the total volume of bacteria. Representative images shown in Figure 6C were presented as a maximum intensity projection, created from the original 3D images by the software.

#### **Dermal full-thickness murine wound infection**

This assay was carried out as previously described(7) with modifications. All procedures were approved by the Ohio State University Institutional Animal Care and Use Committee (2017A00000028-R1; 2008R0135-R1; 2011R00000021-R1). Briefly, 6-week-old female BALB/c mice were anesthetized using isoflurane gas, and the dorsal area was shaved. The dorsal area was then sterilized with ethanol and two identical full-thickness dorsal wounds were generated

with a 6mm punch biopsy tool (Integra™ Miltex®) and bandaged with a Tegaderm dressing (3M). The mice were allowed to recover for 24h before infection. For infection, mid-log *P. aeruginosa* and *S. aureus* (OD<sub>600</sub> = 0.5) were washed and resuspended in 0.9% endotoxin-free saline. Each wound was infected with bacterial cultures containing 5x10<sup>6</sup> cells of either PAO1 (containing a constitutively expressed luminescent marker(8)), USA300 or *crtM*::Tn, or both species. A total of 7 animals were used for each group. To assess PAO1 burden throughout infection, mice were anesthetized, and the wound luminescence was imaged daily with an IVIS Lumina II optical imaging system (PerkinElmer Inc.). The acquired images were scaled to the radiance of 1e8 to 2e9. The average radiance of PAO1-lux on each animal was used to access the PAO1 burden throughout infection. Three days post infection, mice were euthanized by CO<sub>2</sub> inhalation. The wounded tissue was collected, weighed, and placed in separate tubes containing 1 mL of PBS. All samples were homogenized with a Pro Scientific Bio-Gen Series Pro200 hand-held homogenizer for 45 s. The resulting solutions were serially diluted, plated on PIA and MSA, and incubated at 37 °C overnight. CFUs were calculated per gram of tissue.

#### **H&E and IF staining, and pathology analysis on the wound tissues**

3 days post infection, wounds were harvested, fixed in 4% paraformaldehyde for a week, transferred into 100% ethanol, and sent to HistoWiz. The tissues were embedded in paraffin, sectioned longitudinally (4μm), and stained with H&E. Digital skin sections were subjectively assessed by HistoWiz for the severity and extent of inflammation to provide pathology scoring. As for the IF staining, the slides were deparaffinized and blocked with 3% bovine serum albumin supplemented with 50 mM glycine, 0.05 % Tween20, and 0.1% Triton X-100 at 4°C overnight. Slides were then incubated with primary *P. aeruginosa* antibody(9) (1 : 500 dilution) at 4°C overnight and secondary antibody (Alexa Fluor™ 647 chicken anti-rabbit IgG, Invitrogen; 1 : 500 dilution) at room temperature for 1h. They were visualized by microscopy (Nikon ECLIPSE Ti2)

using a 4x objective. 6 wounds were imaged for each group. The depth of PAO1 penetration into the wound and total pixel count were measured by NIS-elements AR software.

#### ***P. aeruginosa* and *S. aureus* planktonic co-culture**

Overnight cultures of PAO1 and USA300 or *crtM*::Tn were diluted to OD<sub>600</sub> 0.05 and combined at a ratio of 1:1 in LB. The co-culture was incubated at 37°C shaking at 200rpm for 24h. It was serially diluted and plated on MSA to enumerate for *S. aureus* CFUs. *S. aureus* survival was normalized to the CFUs at 0h.

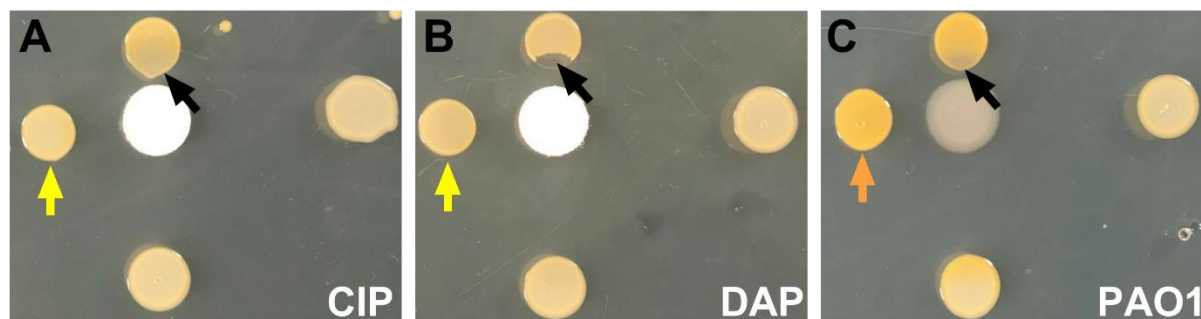

**Fig. S1. *S. aureus* STX production is not induced by antibiotic-mediated growth inhibition.**

USA300 was grown at different distances to discs soaked in 5µL of 1mg/mL ciprofloxacin (CIP), 10mg/mL daptomycin (DAP) or PAO1 overnight culture on solidified media in a macrocolony proximity assay. Yellow arrows point to USA300 colonies with no color change, orange arrows point to USA300 colonies with increased yellow pigmentation and black arrows point to USA300 colonies with inhibited growth.

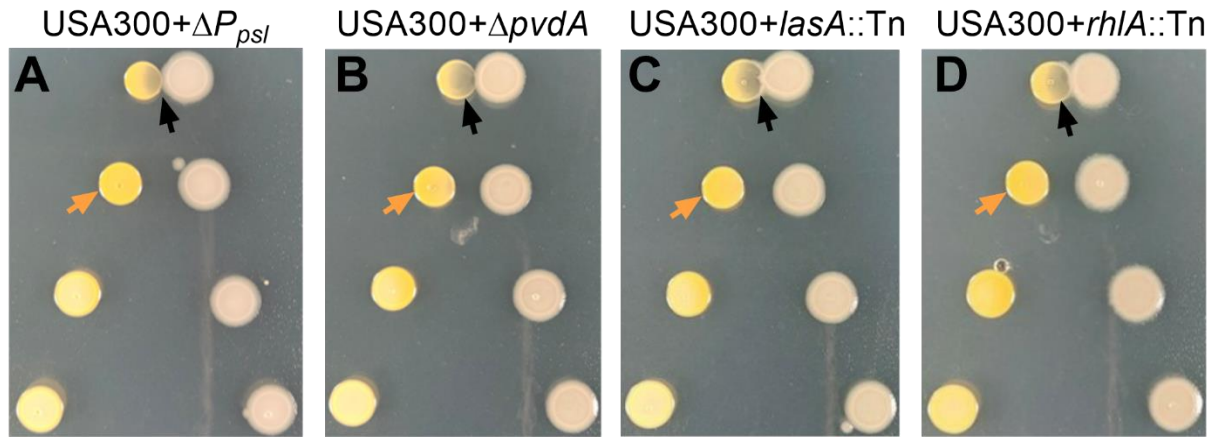

**Fig. S2. *S. aureus* STX production when grown with PAO1 mutants with decreased antagonism towards *S. aureus*.** USA300 was grown at different distances to PAO1 mutants deficient in producing exopolysaccharide Psl (A,  $\Delta P_{psl}$ ), pyoverdine (B,  $\Delta pvdA$ ), protease LasA (C, *lasA*::Tn) or rhamnolipid (D, *rhIA*::Tn) on solidified media in a macrocolony proximity assay. The orange arrows point to USA300 with increased yellow pigmentation, and the black arrows point to USA300 growth inhibition by PAO1.

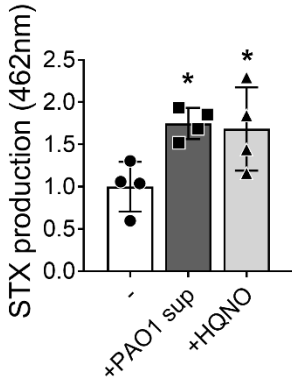

115 Fig. S3. *P. aeruginosa* HQNO induces *S. aureus* STX production in SCFM2. STX production in  
 116 SCFM2-grown USA300 treated with or without 5% filter-sterilized PAO1 spent media (sup) or 5μM  
 117 of HQNO was measured. The results were normalized to the untreated group. Data are presented  
 118 as mean ± SD from the results of at least 3 biological replicates, each with 2 technical replicates.  
 119 \*,  $P < 0.05$ , compared to the untreated group, determined by one-way ANOVA.

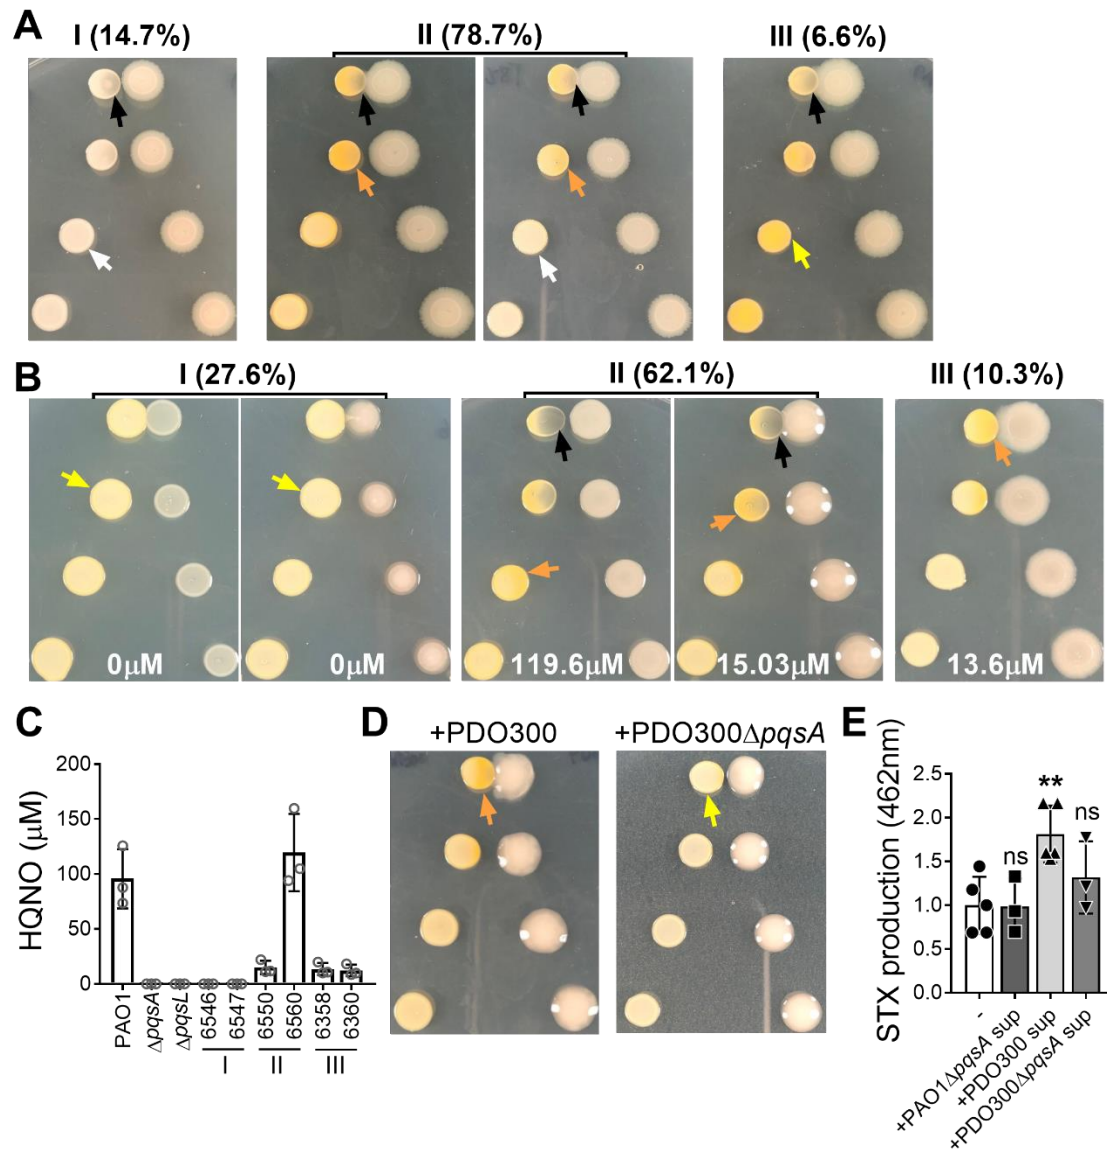

**Fig. S4. *P. aeruginosa* induction of *S. aureus* STX production is prevalent among clinical isolates.** (A) Representative images and their respective proportions (%) of 3 classes of *S. aureus* clinical isolates when grown with *P. aeruginosa* PAO1 in a macrocolony proximity assay. Class I (14.7%) isolates were white colonies. STX production in Class II (78.7%), despite different intrinsic colors of the colonies (yellow: left; white: right), was induced by adjacent PAO1. Class III (6.6%) had yellow colonies, but no STX induction by PAO1. (B) Representative images and their respective proportions (%) of 3 classes of *P. aeruginosa* clinical isolates when grown with *S. aureus* USA300 in a macrocolony proximity assay. Class I (27.6%) did not induce STX production

in the adjacent USA300 macrocolonies. Class II (62.1%) inhibited USA300 growth and induced STX production. Class III (10.3%) induced STX production in USA300 without growth inhibition. Both mucoid (right) and non-mucoid (left) strains were found in Class I and II. HQNO production of the representative strains was quantified and labeled at the bottom of each image. (C) HQNO production of 2 representative *P. aeruginosa* isolates from each class was measured by LC/MS. (D) USA300 was grown at different distances to mucoid PDO300 (left) or PDO300 $\Delta$ pqsA (right) on solidified media in a macrocolony proximity assay. For A, B and C, the yellow arrows point to *S. aureus* colonies with no color change while the orange arrows depict *S. aureus* colonies with increased yellow pigmentation. The black arrows point to *S. aureus* growth inhibition by *P. aeruginosa*. (E) STX production in USA300, treated with (+) or without (-) 20% filter-sterilized PAO1 $\Delta$ pqsA, PDO300 or PDO300 $\Delta$ pqsA spent media (sup), was measured after methanol extraction at 462nm. The results were normalized to the untreated group. Data are presented as mean  $\pm$  SD from the results of at least 3 biological replicates, each with 2 technical replicates. \*\*,  $P < 0.01$ ; ns, not significant, compared to the untreated group, determined by one-way ANOVA.

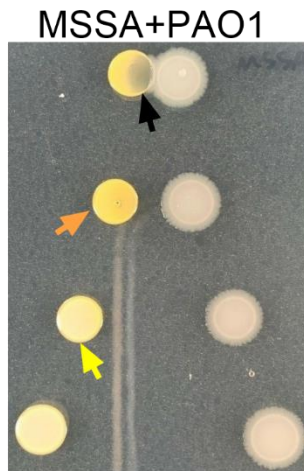

142 **Fig. S5. Methicillin-sensitive *S. aureus* STX production is induced by *P. aeruginosa*.** MSSA  
143 was grown at different distances to PAO1 on solidified media in a macrocolony proximity assay.  
144 The orange arrow points to MSSA with increased yellow pigmentation, the yellow arrow points to  
145 MSSA with no color change, and the black arrow points to MSSA growth inhibition by PAO1.

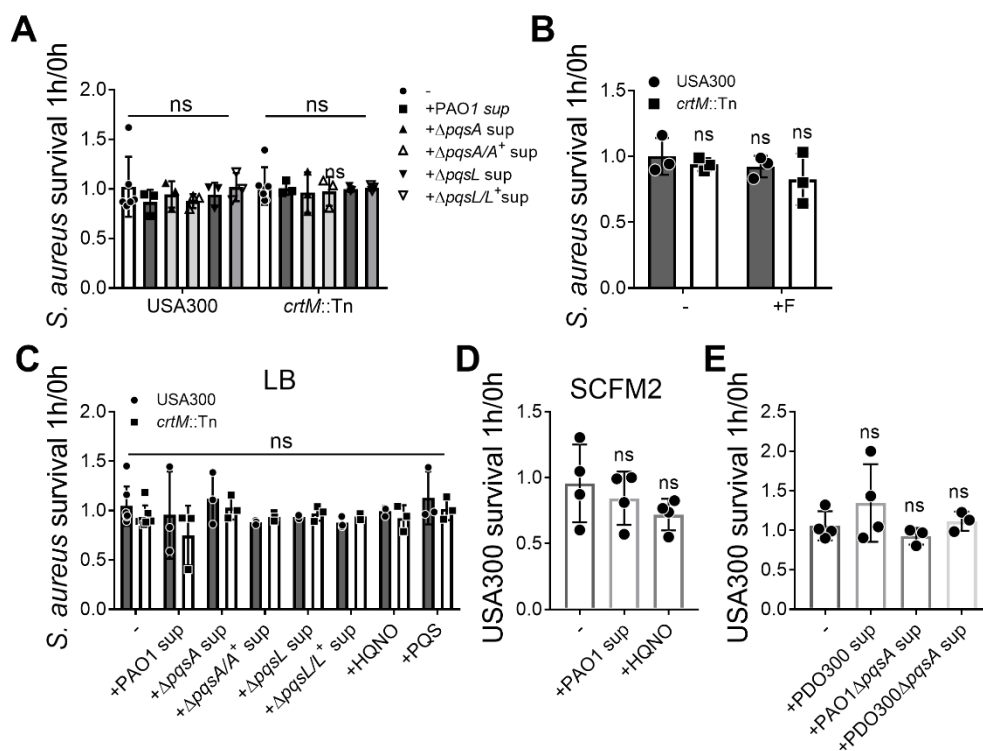

**Fig. S6. *S. aureus* survival when treated with H<sub>2</sub>O<sub>2</sub>.** (A) USA300 and *crtM::Tn* were pre-treated with or without 5% filter-sterilized *P. aeruginosa* spent media (sup) overnight and then subjected to 3% H<sub>2</sub>O<sub>2</sub> killing for 1h. (B) USA300 and *crtM::Tn* were grown overnight in the presence of 50 $\mu$ g/mL flavone (+F) to inhibit STX production, mixed with an equal amount of PAO1, and subjected to 3% H<sub>2</sub>O<sub>2</sub> killing for 1h. (C,D) USA300 and *crtM::Tn* were pre-treated with or without 5% (v/v) filter-sterilized *P. aeruginosa* spent media (sup), or 5 $\mu$ M HQNO or PQS overnight, mixed with an equal amount of PAO1, and subjected to 3% H<sub>2</sub>O<sub>2</sub> killing for 1h in either LB (C) or SCFM2 (D). (E) USA300 was pre-treated with or without 20% (v/v) filter sterilized PAO1 $\Delta pqsA$ , PDO300 or PDO300 $\Delta pqsA$  spent media (sup), mixed with an equal amount of PDO300, and subjected to 3% H<sub>2</sub>O<sub>2</sub> killing for 1h. *S. aureus* survival is presented as CFUs normalized to the starting CFUs at 0h. Data presented as mean  $\pm$  SD from the results of at least 3 biological replicates, each with 3 technical replicates. ns, not significant, compared to USA300 with no treatment (-), determined by ANOVA.

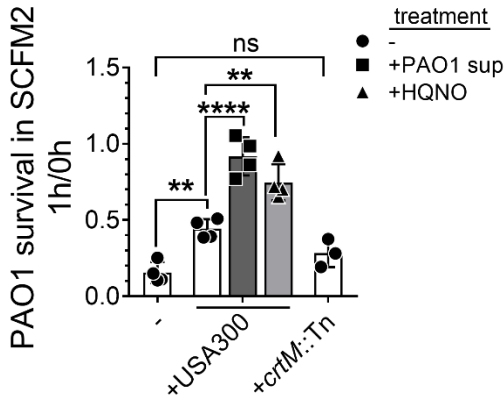

**Fig. S7. STX induction protects *P. aeruginosa* from H<sub>2</sub>O<sub>2</sub>-mediated killing in SCFM2.** PAO1, alone or mixed with an equal amount of *S. aureus* with various treatments, was subjected to 3% H<sub>2</sub>O<sub>2</sub>-mediated killing for 1h in SCFM2. USA300 was pre-treated with or without 5% filter-sterilized PAO1 spent media (sup), or 5μM HQNO overnight. PAO1 survival is presented as CFUs normalized to the starting CFUs at 0h. Data are presented as mean ± SD from the results of at least 3 biological replicates, each with 3 technical replicates. \*\*,  $P < 0.01$ ; \*\*\*\*,  $P < 0.0001$ ; ns, not significant, determined by one-way ANOVA.

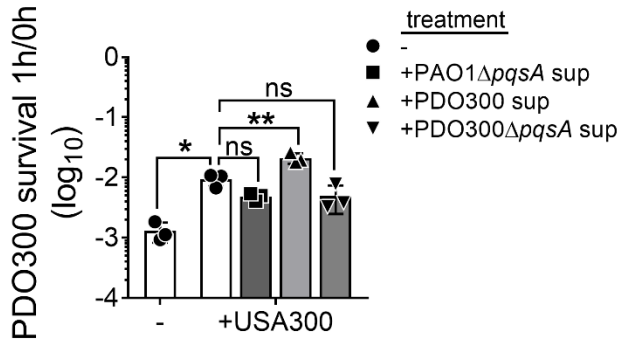

Fig. S8. STX induction protects mucoid *P. aeruginosa* from H<sub>2</sub>O<sub>2</sub>-mediated killing. PDO300, either alone or mixed with an equal amount of USA300 with various treatments, was subjected to 3% H<sub>2</sub>O<sub>2</sub>-mediated killing for 1h. USA300 was pre-treated with or without 20% (v/v) filter-sterilized PAO1ΔpqsA, PDO300 or PDO300ΔpqsA spent media (sup). PDO300 survival is presented as CFUs normalized to the starting CFUs at 0h. Data are presented as mean ± SD from the results of at least 3 biological replicates, each with 3 technical replicates. \*, *P* < 0.05; \*\*, *P* < 0.01; ns, not significant, determined by one-way ANOVA.

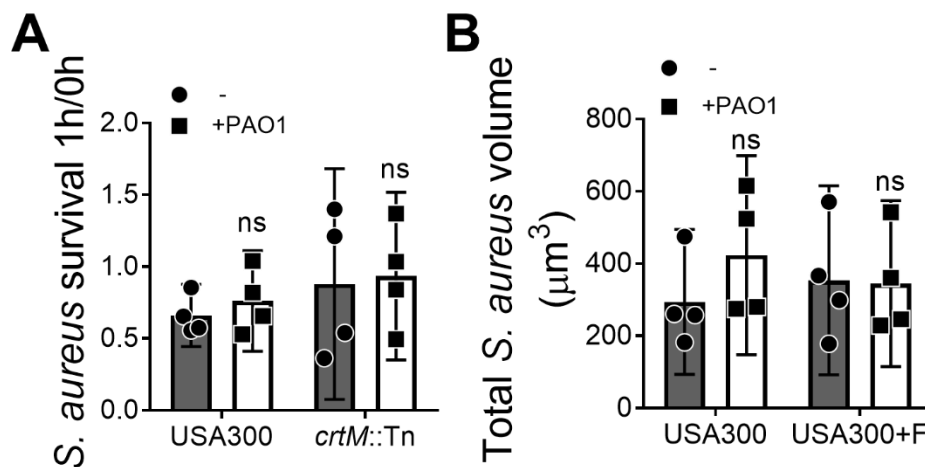

**Fig. S9. *S. aureus* survival in the presence of human neutrophils.** (A) USA300 or *crtM::Tn*, either alone or mixed with an equal amount of PAO1, was subjected to human neutrophil killing for 1h (MOI = 10 for each species). *S. aureus* survival is presented as CFUs normalized to the starting CFUs at 0h. Data presented as mean  $\pm$  95%CI from the results of at 4 biological replicates, each with 3 technical replicates. (B) USA300-GFP was pre-treated with 50 $\mu\text{g}/\text{mL}$  flavone (+F) to inhibit STX production, then mixed with or without an equal amount of PAO1-TdTomato, was added to adhered human neutrophil (PMN) for 1h. Total *S. aureus* volume was measured by NIS-Element AR software. Data presented as mean  $\pm$  95%CI from the results of at least 4 biological replicates, each with 6 technical replicates. ns, not significant, compared to *S. aureus* without the presence of PAO1 (-), determined by two-way ANOVA.

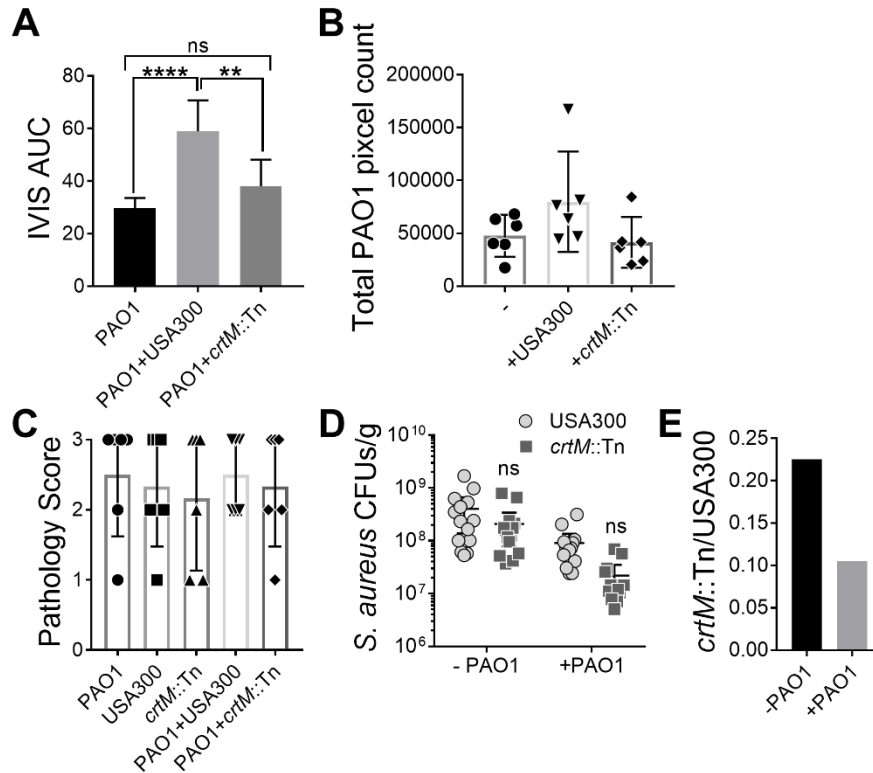

Fig. S10. Analysis of *P. aeruginosa* and *S. aureus* co-infection in the mouse wound model. (A) AUC of Figure 7D comparing PAO1 bioluminescent signal intensity among PAO1 mono-infection and co-infections with USA300 or *crtM*::Tn through the 3-day infection. Data presented as mean  $\pm$  95%CI from the results of >12 biological replicates. \*\*,  $P < 0.01$ ; \*\*\*\*,  $P < 0.0001$ ; ns, not significant, determined by one-way ANOVA. (B) PAO1 total pixel count from IF-stained wound sections among all groups was quantified. Data presented as mean  $\pm$  95%CI from the results of 6 biological replicates. (C) Pathology scores of the wound tissues 3 days after infection among all groups. Data presented as mean  $\pm$  95%CI from the results of 6 biological replicates. (D) USA300 and *crtM*::Tn CFU/g among all groups were quantified. Data presented as mean  $\pm$  95%CI from the results of at least 12 biological replicates, each with 3 technical replicates. ns, not significant, compared to USA300 infection, determined by two-way ANOVA. (E) The ratio of *crtM*::Tn survival to that of USA300 was compared between *S. aureus* mono-infection (-PAO1) and co-infection with PAO1 (+PAO1).

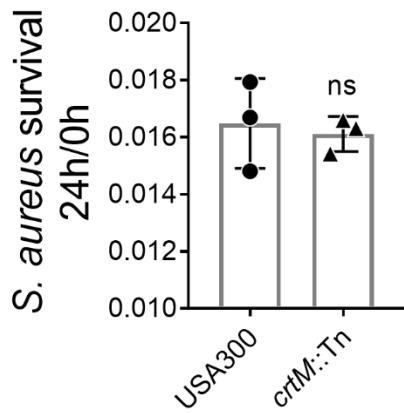

**Fig. S11. *S. aureus* survival in co-culture with PAO1.** USA300 or *crtM::Tn* were cultured with PAO1 in LB for 24h. *S. aureus* survival was quantified by comparing CFUs at 24h to that of 0h. Data presented as mean  $\pm$  SD from the results of 3 biological replicates, each with 2 technical replicates. ns, not significant, compared to USA300, determined by one-way ANOVA.

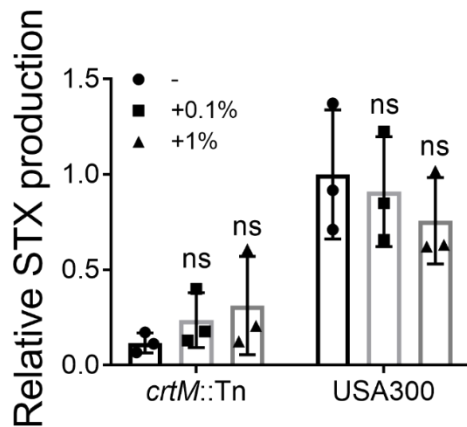

**Fig. S12. *S. aureus* STX production is not induced when treated with H<sub>2</sub>O<sub>2</sub>.** STX production in USA300 and *crtM::Tn*, treated with (+) or without (-) 0.1% or 1% H<sub>2</sub>O<sub>2</sub>, was measured after methanol extraction at 462nm. The results were normalized to the untreated USA300. Data are presented as mean  $\pm$  SD from the results of 3 biological replicates, each with 2 technical replicates. ns, not significant, compared to the untreated group, determined by one-way ANOVA.

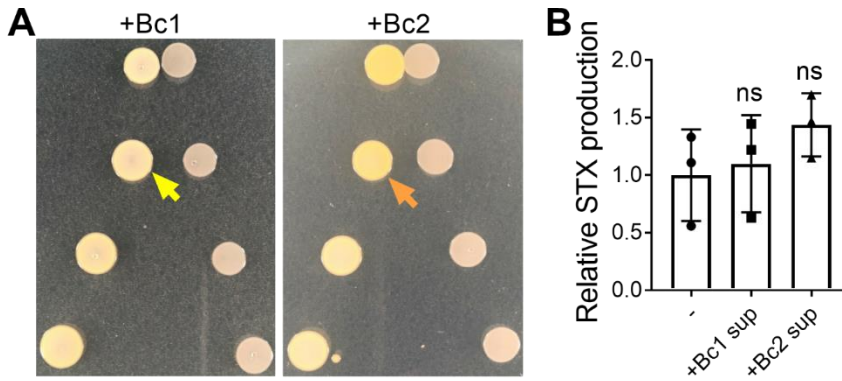

**Fig. S13. *S. aureus* STX production can be induced by *B. cepacia* at a modest level.** (A) USA300 was grown at different distances to 2 different *B. cepacia* strains (Bc1, Bc2) on solidified media in a macrocolony proximity assay. The orange arrow points to USA300 with increased yellow pigmentation, yellow arrow points to no color change. (B) STX production in USA300, treated with (+) or without (-) filter-sterilized *B. cepacia* spent media (sup), was measured after methanol extraction at 462nm. The results were normalized to the untreated group. Data are presented as mean  $\pm$  SD from the results of 3 biological replicates, each with 2 technical replicates. ns, not significant, compared to the untreated group, determined by one-way ANOVA.

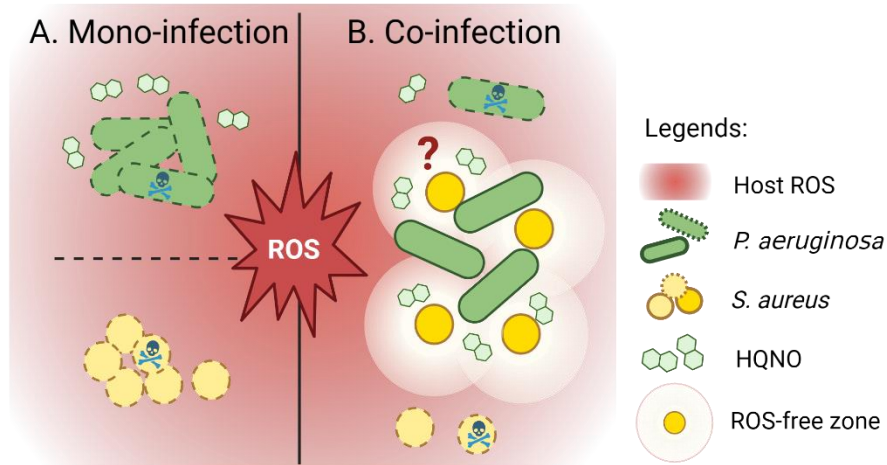

**Fig. S14. Schematic summary of *S. aureus* STX-mediated protection to *P. aeruginosa* from host ROS.** (A) During mono-infections, *P. aeruginosa* and *S. aureus* are susceptible to host ROS killing indicated by lysed bacteria. (B) During co-infections, *P. aeruginosa*-secreted HQNO induces STX production (indicated by increased yellow pigmentation) in *S. aureus* which protects both bacterial species from host ROS, possibly by creating an ROS-free zone around the *S. aureus* cells. (Figure created with BioRender.com)

**Table S1. Strains used in this study**

| Strains                                    | Description                                                                      | Source     |
|--------------------------------------------|----------------------------------------------------------------------------------|------------|
| <i>P. aeruginosa</i><br>laboratory strains |                                                                                  |            |
| PAO1                                       | WT <i>P. aeruginosa</i>                                                          | (10)       |
| $\Delta pqsA$                              | PAO1 <i>pqsA</i> deletion mutant                                                 | (11)       |
| $\Delta pqsA/A^+$                          | Chromosomal complementation of PAO1 $\Delta pqsA$                                | this study |
| $\Delta pqsL$                              | PAO1 <i>pqsL</i> deletion mutant                                                 | this study |
| $\Delta pqsL/L^+$                          | Chromosomal complementation of PAO1 $\Delta pqsL$                                | this study |
| PDO300                                     | Mucoid, a <i>mucA</i> derivative of PAO1                                         | (12)       |
| PDO300 $\Delta pqsA$                       | Mucoid, <i>pqsA</i> deleted in PDO300                                            | this study |
| PAO1-TdTomato                              | PAO1 carrying a constitutively expressed Td-tomato producing plasmid             | (5)        |
| PAO1-lux                                   | Luminescent PAO1                                                                 | (8)        |
| $\Delta PpsI$                              | PAO1 <i>psI</i> production deficient; <i>psI</i> operon promoter deletion mutant | (10)       |
| $\Delta pvdA$                              | PAO1 <i>pvdA</i> deletion mutant                                                 | (11)       |
| <i>rhIA</i> ::Tn                           | <i>rhIA</i> transposon mutant (UWGC:PW6886, PA3479::IS <i>phoA</i> /hah)         | (13)       |
| <i>lasA</i> ::Tn                           | <i>lasA</i> transposon mutant (UWGC:PW4282, PA1871::IS <i>lacZ</i> /hah)         | (13)       |
| <i>P. aeruginosa</i><br>clinical isolates  |                                                                                  |            |
| 6546                                       | CF clinical isolate, mucoid                                                      | this study |
| 6547                                       | CF clinical isolate                                                              | this study |
| 6548                                       | CF clinical isolate                                                              | this study |
| 6550                                       | CF clinical isolate, mucoid                                                      | this study |
| 6551                                       | CF clinical isolate, mucoid                                                      | this study |
| 6559                                       | CF clinical isolate                                                              | this study |
| 6560                                       | 0CH5M4, CF clinical isolate                                                      | (11)       |
| 6561                                       | 0CH7HJ, CF clinical isolate                                                      | (11)       |
| 6565                                       | 0CHBKC, CF clinical isolate                                                      | (11)       |
| 6566                                       | 0CHBKD, CF clinical isolate                                                      | (11)       |
| 6354                                       | Wound isolate                                                                    | this study |
| 6355                                       | Wound isolate                                                                    | this study |
| 6356                                       | Wound isolate                                                                    | this study |
| 6357                                       | Wound isolate                                                                    | this study |
| 6358                                       | Wound isolate                                                                    | this study |
| 6359                                       | Wound isolate                                                                    | this study |
| 6360                                       | Wound isolate                                                                    | this study |
| 6361                                       | Wound isolate                                                                    | this study |
| 6362                                       | Wound isolate                                                                    | this study |
| 6363                                       | Wound isolate                                                                    | this study |
| 6364                                       | Wound isolate                                                                    | this study |
| 6365                                       | Wound isolate                                                                    | this study |
| 6366                                       | Wound isolate                                                                    | this study |
| 6367                                       | Wound isolate                                                                    | this study |

|                                    |                                                            |            |
|------------------------------------|------------------------------------------------------------|------------|
| 2901                               | CF clinical isolate                                        | this study |
| 2902                               | CF clinical isolate, mucoid                                | this study |
| 2903                               | CF clinical isolate                                        | this study |
| 2905                               | CF clinical isolate, mucoid                                | this study |
| 2906                               | CF clinical isolate                                        | this study |
| <hr/>                              |                                                            |            |
| <i>S. aureus</i>                   |                                                            |            |
| laboratory strains                 |                                                            |            |
| USA300                             | WT <i>S. aureus</i>                                        | (14)       |
| MSSA                               | ATCC 29213, Methicillin sensitive <i>S. aureus</i>         | ATCC       |
| USA300-GFP                         | USA300 with constitutively expressed GFP on the chromosome | (6)        |
| <i>crtM</i> ::Tn                   | <i>crtM</i> transposon mutant (NE1444, NARSA)              | (14)       |
| <hr/>                              |                                                            |            |
| <i>S. aureus</i> clinical isolates |                                                            |            |
| 6538                               | CF clinical isolate                                        | this study |
| 6539                               | CF clinical isolate                                        | this study |
| 6540                               | CF clinical isolate                                        | this study |
| 6541                               | CF clinical isolate                                        | this study |
| 6542                               | CF clinical isolate                                        | this study |
| 6543                               | CF clinical isolate                                        | this study |
| 6544                               | CF clinical isolate                                        | this study |
| 6545                               | CF clinical isolate                                        | this study |
| 6553                               | CF clinical isolate                                        | this study |
| 6554                               | CF clinical isolate                                        | this study |
| 6555                               | CF clinical isolate                                        | this study |
| 6556                               | CF clinical isolate                                        | this study |
| 6557                               | CF clinical isolate                                        | this study |
| 6558                               | CF clinical isolate                                        | this study |
| 6562                               | CF clinical isolate                                        | this study |
| 6563                               | CF clinical isolate                                        | this study |
| 6564                               | CF clinical isolate                                        | this study |
| 6567                               | CF clinical isolate                                        | this study |
| 6569                               | CF clinical isolate                                        | this study |
| 6585                               | CF clinical isolate                                        | this study |
| 6586                               | CF clinical isolate                                        | this study |
| 6587                               | CF clinical isolate                                        | this study |
| 6588                               | CF clinical isolate                                        | this study |
| 6589                               | CF clinical isolate                                        | this study |
| 6590                               | CF clinical isolate                                        | this study |
| 6591                               | CF clinical isolate                                        | this study |
| 6592                               | CF clinical isolate                                        | this study |
| 6593                               | CF clinical isolate                                        | this study |
| 6594                               | CF clinical isolate                                        | this study |
| 6595                               | CF clinical isolate                                        | this study |

|                           |                                 |            |
|---------------------------|---------------------------------|------------|
| 6596                      | CF clinical isolate             | this study |
| 6637                      | CF clinical isolate             | this study |
| 4101                      | Bloodstream isolate             | this study |
| 4102                      | Bloodstream isolate             | this study |
| 4103                      | Bloodstream isolate             | this study |
| 4104                      | Bloodstream isolate             | this study |
| 4105                      | Bloodstream isolate             | this study |
| 4106                      | Bloodstream isolate             | this study |
| 4107                      | Bloodstream isolate             | this study |
| 4108                      | Bloodstream isolate             | this study |
| 4109                      | Bloodstream isolate             | this study |
| 4110                      | Bloodstream isolate             | this study |
| 4111                      | Bloodstream isolate             | this study |
| 4112                      | Bloodstream isolate             | this study |
| 4113                      | Bloodstream isolate             | this study |
| 4114                      | Bloodstream isolate             | this study |
| 4115                      | Bloodstream isolate             | this study |
| 4116                      | Bloodstream isolate             | this study |
| 4117                      | Bloodstream isolate             | this study |
| 4118                      | Bloodstream isolate             | this study |
| 4119                      | Bloodstream isolate             | this study |
| 4120                      | Bloodstream isolate             | this study |
| 4121                      | Bloodstream isolate             | this study |
| 4122                      | Bloodstream isolate             | this study |
| 4123                      | Bloodstream isolate             | this study |
| 4124                      | Bloodstream isolate             | this study |
| 4125                      | Bloodstream isolate             | this study |
| 4126                      | Bloodstream isolate             | this study |
| 4127                      | Bloodstream isolate             | this study |
| 4128                      | Bloodstream isolate             | this study |
| 4129                      | Bloodstream isolate             | this study |
| 4130                      | Bloodstream isolate             | this study |
| <i>B. cepacia</i> strains |                                 |            |
| Bc1                       | <i>B. cepacia</i> strain HI2424 | (15)       |
| Bc2                       | <i>B. cepacia</i> strain MH1K   | (16)       |

222 **Table S2. STX production and induction in *S. aureus* clinical isolates**

|       | Total #(% ) | I         | II         | III      |
|-------|-------------|-----------|------------|----------|
| CF    | 31 (100%)   | 5 (16.1%) | 23 (74.2%) | 3 (9.7%) |
| Blood | 30 (100%)   | 4 (13.3%) | 25 (83.3%) | 1 (3.3%) |
| Total | 61 (100%)   | 9 (14.7%) | 48 (78.7%) | 4 (6.6%) |

223 I: no STX production

224 II: STX induced by PAO1

225 III: produces STX but no induction by PAO1

226 \* No significant difference was found when comparing the classifications of isolates derived from  
 227 different sources.

228

229 **Table S3. STX induction by *P. aeruginosa* clinical isolates**

|       | Total #(%) | I         | II         | III       |
|-------|------------|-----------|------------|-----------|
| CF    | 15 (100%)  | 7 (46.7%) | 8 (53.3%)  | 0 (0%)    |
| Wound | 14 (100%)  | 1 (7.1%)  | 10 (71.4%) | 3 (21.4%) |
| Total | 29 (100%)  | 8 (27.6%) | 18 (62.1%) | 3 (10.3%) |

230 I: no STX induction nor growth inhibition

231 II: induces STX production with growth inhibition

232 III: induces STX production without growth inhibition

233 \* No significant difference was found when comparing the classifications of isolates derived from  
 234 different sources.

## SI References

1. Lepine F, Deziel E, Milot S, Rahme LG. 2003. A stable isotope dilution assay for the quantification of the *Pseudomonas* quinolone signal in *Pseudomonas aeruginosa* cultures. *Biochim Biophys Acta* 1622:36-41.
2. Nauseef WM. 2007. Isolation of human neutrophils from venous blood. *Methods Mol Biol* 412:15-20.
3. Strober W. 2001. Trypan blue exclusion test of cell viability. *Curr Protoc Immunol Appendix* 3:Appendix 3B.
4. Mishra M, Byrd MS, Sergeant S, Azad AK, Parsek MR, McPhail L, Schlesinger LS, Wozniak DJ. 2012. *Pseudomonas aeruginosa* Psl polysaccharide reduces neutrophil phagocytosis and the oxidative response by limiting complement-mediated opsonization. *Cell Microbiol* 14:95-106.
5. Melvin JA, Gaston JR, Phillips SN, Springer MJ, Marshall CW, Shanks RMQ, Bomberger JM. 2017. *Pseudomonas aeruginosa* Contact-Dependent Growth Inhibition Plays Dual Role in Host-Pathogen Interactions. *mSphere* 2.
6. Chiu IM, Heesters BA, Ghasemlou N, Von Hehn CA, Zhao F, Tran J, Wainger B, Strominger A, Muralidharan S, Horswill AR, Bubeck Wardenburg J, Hwang SW, Carroll MC, Woolf CJ. 2013. Bacteria activate sensory neurons that modulate pain and inflammation. *Nature* 501:52-7.
7. Pestrak MJ, Baker P, Dellos-Nolan S, Hill PJ, Passos da Silva D, Silver H, Lacdao I, Raju D, Parsek MR, Wozniak DJ, Howell PL. 2019. Treatment with the *Pseudomonas aeruginosa* Glycoside Hydrolase PslG Combats Wound Infection by Improving Antibiotic Efficacy and Host Innate Immune Activity. *Antimicrob Agents Chemother* 63.
8. Lochab V, Jones TH, Dusane DH, Peters CW, Stoodley P, Wozniak DJ, Subramaniam VV, Prakash S. 2020. Ultrastructure imaging of *Pseudomonas aeruginosa* lawn biofilms and eradication of the tobramycin-resistant variants under in vitro electroceutical treatment. *Sci Rep* 10:9879.
9. Roy S, Elgharably H, Sinha M, Ganesh K, Chaney S, Mann E, Miller C, Khanna S, Bergdall VK, Powell HM, Cook CH, Gordillo GM, Wozniak DJ, Sen CK. 2014. Mixed-species biofilm compromises wound healing by disrupting epidermal barrier function. *J Pathol* 233:331-343.
10. Ma L, Jackson KD, Landry RM, Parsek MR, Wozniak DJ. 2006. Analysis of *Pseudomonas aeruginosa* conditional psl variants reveals roles for the psl polysaccharide in adhesion and maintaining biofilm structure postattachment. *J Bacteriol* 188:8213-21.
11. Liu Y, Gloag ES, Hill PJ, Parsek MR, Wozniak DJ. 2022. Interbacterial Antagonism Mediated by a Released Polysaccharide. *J Bacteriol* 204:e0007622.
12. Mathee K, Ciofu O, Sternberg C, Lindum PW, Campbell JIA, Jensen P, Johnsen AH, Givskov M, Ohman DE, Soren M, Hoiby N, Kharazmi A. 1999. Mucoid conversion of *Pseudomonas aeruginosa* by hydrogen peroxide: a mechanism for virulence activation in the cystic fibrosis lung. *Microbiology (Reading)* 145 ( Pt 6):1349-1357.
13. Jacobs MA, Alwood A, Thaipisuttikul I, Spencer D, Haugen E, Ernst S, Will O, Kaul R, Raymond C, Levy R, Chun-Rong L, Guenther D, Bovee D, Olson MV, Manoil C. 2003. Comprehensive transposon mutant library of *Pseudomonas aeruginosa*. *Proc Natl Acad Sci U S A* 100:14339-44.
14. Fey PD, Endres JL, Yajjala VK, Widhelm TJ, Boissy RJ, Bose JL, Bayles KW. 2013. A genetic resource for rapid and comprehensive phenotype screening of nonessential *Staphylococcus aureus* genes. *mBio* 4:e00537-12.
15. Cooper VS, Staples RK, Traverse CC, Ellis CN. 2014. Parallel evolution of small colony variants in *Burkholderia cenocepacia* biofilms. *Genomics* 104:447-52.
16. Abdulrahman BA, Khweek AA, Akhter A, Caution K, Tazi M, Hassan H, Zhang Y, Rowland PD, Malhotra S, Aeffner F, Davis IC, Valvano MA, Amer AO. 2013. Depletion of the ubiquitin-

286 binding adaptor molecule SQSTM1/p62 from macrophages harboring cftr DeltaF508 mutation  
287 improves the delivery of Burkholderia cenocepacia to the autophagic machinery. J Biol Chem  
288 288:2049-58.  
289
